# Supplementary material
Source: MDPI journal article supplement (https://www.mdpi.com/2227-9717/11/1/163)
Supplement: s1 [file s1]

## *Supporting file*

### **Impact of Self-fabricated Graphene-Metal Oxide Composite anodes on Metal Degradation and Energy Generation via Microbial Fuel Cell**

Akil Ahmad<sup>1\*</sup>, Mohammed B. Alshammari<sup>1</sup>, Mohamad Nasir Mohamad Ibrahim<sup>2</sup>

<sup>1</sup>Department of Chemistry, College of Science and Humanities in Al-Kharj, Prince Sattam bin Abdulaziz University, Al-Kharj 11942, Saudi Arabia

<sup>2</sup>Materials Technology Research Group (MaTRec), School of Chemical Sciences, Universiti Sains Malaysia, Minden 11800, Penang, Malaysia

**\*Corresponding author:** [aj.ahmad@psau.edu.sa](mailto:aj.ahmad@psau.edu.sa)

**Table S1:** Comparative analysis of previously published research and the current work in MFC.

| Electrode            |                 | Type of fuel cell | Organic substrate                       | Inoculation source                | Current density (mA/cm <sup>2</sup> ) | Power density                    | Reference |
|----------------------|-----------------|-------------------|-----------------------------------------|-----------------------------------|---------------------------------------|----------------------------------|-----------|
| Anode                | Cathode         |                   |                                         |                                   |                                       |                                  |           |
| Carbon veil          | Carbon veil     | DMFC              | Landfill leachate                       | Leachate and sludge               | 0.0004                                | 188.91 ± 19.48 μW/m <sup>2</sup> | [1]       |
| Graphite fiber brush | Pt wire         | DMFC              | Macroalgae, Ulva lactuca                | Mixed culture                     | 0.025                                 | 0.98 mW/m <sup>2</sup>           | [2]       |
| Graphite plates      | Graphite plates | DMFC              | Malt extract, yeast extract and glucose | Pure culture of <i>E. cloacae</i> | 0.067                                 | 19.2 μW                          | [3]       |
| Carbon cloth         | Carbon cloth    | SMFC              | Brewery wastewater                      | Full strength brewery wastewater  | 0.2                                   | 205 mW/m <sup>2</sup>            | [4]       |

|                        |                                                                     |      |                               |                           |       |                        |                     |
|------------------------|---------------------------------------------------------------------|------|-------------------------------|---------------------------|-------|------------------------|---------------------|
| Multiple carbon fibers | Activated carbon/polytetrafluoroethylene (PTFE)/Pt/ stainless steel | SMFC | Beer brewery wastewater       | Anaerobic mixed consortia | 0.18  | 264 mW/m <sup>2</sup>  | [5]                 |
| Graphite rods          | Graphite rods                                                       | DMFC | Chocolate industry wastewater | Activated sludge          | 0.302 | -                      | [6]                 |
| GO                     | Graphite rod                                                        | MFC  | Food waste                    | Synthetic wastewater      | 28.94 | 0.69 mW/m <sup>2</sup> | <b>Present work</b> |
| GO-ZnO                 | Graphite rod                                                        | MFC  | Food waste                    | Synthetic wastewater      | 38.15 | 1.05 mW/m <sup>2</sup> | <b>Present work</b> |

DMFC= Double chamber microbial fuel cell; SMFC= Single chamber microbial fuel cell; BMFC= Benthic microbial fuel cell.

**Table S2:** A comparison of the degradation of metal ions using various anodes in MFC.

| Metals | Initial concentration (ppm) | Anode material | Cathode material | Inoculation source | Organic substrate | Degradation efficiency (%) | Reference |
|--------|-----------------------------|----------------|------------------|--------------------|-------------------|----------------------------|-----------|
|--------|-----------------------------|----------------|------------------|--------------------|-------------------|----------------------------|-----------|

|         |     |                                        |                                        |                              |                |      |     |
|---------|-----|----------------------------------------|----------------------------------------|------------------------------|----------------|------|-----|
| Cr (VI) | 20  | Graphite felt                          | Graphite felt                          | Anaerobic<br>digester sludge | Glucose        | 79   | [7] |
| Cr (VI) | 100 | Non-wet proof<br>plain carbon<br>cloth | Non-wet proof<br>plain carbon<br>cloth | Anaerobic<br>sludge          | -              | 99   | [8] |
| Cd (II) | 100 | Graphite<br>granules                   | Carbon felt                            | Contaminated<br>soil         | Sodium acetate | 31   | [9] |
| Pb (II) | 900 | Graphite<br>granules                   | Carbon felt                            | Contaminated<br>soil         | Sodium acetate | 44.1 | [9] |

|         |     |               |               |                                    |                |      |      |
|---------|-----|---------------|---------------|------------------------------------|----------------|------|------|
| V(V)    | 200 | Carbon felt   | Carbon fiber  | <i>Dysgonomonas and Klebsiella</i> | Acetate        | 60.7 | [10] |
| Cd(II)  | 50  | Graphite felt | Graphite felt | Mixed microbial culture            | Acetate        | 60   | [11] |
| Hg (II) | 25  | Graphite felt | Graphite felt | Mixed microbial culture            | Acetate        | 55   | [11] |
| Ni (II) | 32  | Graphite felt | Graphite felt | Mixed microbial culture            | Sodium acetate | 95   | [12] |

|         |     |                     |                |                         |                          |       |      |
|---------|-----|---------------------|----------------|-------------------------|--------------------------|-------|------|
| Cr (VI) | 100 | Graphite plate      | Graphite plate | Anaerobic<br>sludge bed | Sodium acetate           | 82    | [12] |
| Cr (VI) | -   | Graphite<br>brushes | Carbon cloth   | Anaerobic<br>sludge     | Glucose                  | 99    | [13] |
| U(VI)   | 680 | Graphite felt       | Graphite felt  | Nuclear waste<br>sludge | Acetate                  | 90    | [14] |
| Cu (II) | 500 | Carbon felt         | Carbon felt    | Soil sludge             | Glucose                  | 94    | [15] |
| Pb (II) | 50  | Graphene<br>oxide   | Graphite rod   | Wastewater              | Sweat potatoes<br>wastes | 60.33 | [16] |

|                       |       |                        |              |                         |                          |       |                     |
|-----------------------|-------|------------------------|--------------|-------------------------|--------------------------|-------|---------------------|
| Cd (II)               | 50    | Graphene<br>oxide/PANI | Graphite rod | Wastewater              | Sweat potatoes<br>wastes | 65.51 | [16]                |
| Mixture<br>metal ions | of 10 | GO                     | Graphite rod | Synthetic<br>wastewater | Food waste               | 81.20 | <b>Present work</b> |
| Mixture<br>metal ions | of 10 | GO-ZnO                 | Graphite rod | Synthetic<br>wastewater | Food waste               | 92.71 | <b>Present work</b> |

**Note:** The table information was taken from the reference [17] with permission, although its open access article.

## Reference:

1. Greenman, J.; Gálvez, A.; Giusti, L.; Ieropoulos, I. Electricity from landfill leachate using microbial fuel cells: comparison with a biological aerated filter. *Enzyme and Microbial Technology* **2009**, *44*, 112-119.
2. Velasquez-Orta, S.B.; Curtis, T.P.; Logan, B.E. Energy from algae using microbial fuel cells. *Biotechnology and bioengineering* **2009**, *103*, 1068-1076.
3. Mohan, Y.; Kumar, S.M.M.; Das, D. Electricity generation using microbial fuel cells. *International Journal of Hydrogen Energy* **2008**, *33*, 423-426.
4. Feng, Y.; Wang, X.; Logan, B.E.; Lee, H. Brewery wastewater treatment using air-cathode microbial fuel cells. *Applied microbiology and biotechnology* **2008**, *78*, 873-880.
5. Wen, Q.; Wu, Y.; Cao, D.; Zhao, L.; Sun, Q. Electricity generation and modeling of microbial fuel cell from continuous beer brewery wastewater. *Bioresource technology* **2009**, *100*, 4171-4175.
6. Patil, S.A.; Surakasi, V.P.; Koul, S.; Ijmulwar, S.; Vivek, A.; Shouche, Y.; Kapadnis, B. Electricity generation using chocolate industry wastewater and its treatment in activated sludge based microbial fuel cell and analysis of developed microbial community in the anode chamber. *Bioresource technology* **2009**, *100*, 5132-5139.
7. Wu, X.; Zhu, X.; Song, T.; Zhang, L.; Jia, H.; Wei, P. Effect of acclimatization on hexavalent chromium reduction in a biocathode microbial fuel cell. *Bioresource technology* **2015**, *180*, 185-191.
8. Gangadharan, P.; Nambi, I.M. Hexavalent chromium reduction and energy recovery by using dual-chambered microbial fuel cell. *Water Science and Technology* **2015**, *71*, 353-358.

9. Habibul, N.; Hu, Y.; Sheng, G.-P. Microbial fuel cell driving electrokinetic remediation of toxic metal contaminated soils. *Journal of hazardous materials* **2016**, *318*, 9-14.
10. Qiu, R.; Zhang, B.; Li, J.; Lv, Q.; Wang, S.; Gu, Q. Enhanced vanadium (V) reduction and bioelectricity generation in microbial fuel cells with biocathode. *Journal of Power Sources* **2017**, *359*, 379-383.
11. Gai, R.; Liu, Y.; Liu, J.; Yan, C.; Jiao, Y.; Cai, L.; Zhang, L. Behavior of copper, nickel, cadmium and mercury ions in anode chamber of microbial fuel cells. *International Journal of Electrochemical Science* **2018**, *13*, 3050-3062.
12. Li, F.; Jin, C.; Choi, C.; Lim, B. SIMULTANEOUS REMOVAL AND/OR RECOVERY OF Cr (VI) AND Cr (III) USING A DOUBLE MFC TECHNIQUE. *Environmental Engineering & Management Journal (EEMJ)* **2019**, *18*.
13. Wang, H.; Song, X.; Zhang, H.; Tan, P.; Kong, F. Removal of hexavalent chromium in dual-chamber microbial fuel cells separated by different ion exchange membranes. *Journal of hazardous materials* **2020**, *384*, 121459.
14. Vijay, A.; Khandelwal, A.; Chhabra, M.; Vincent, T. Microbial fuel cell for simultaneous removal of uranium (VI) and nitrate. *Chemical Engineering Journal* **2020**, *388*, 124157.
15. Zhang, J.; Cao, X.; Wang, H.; Long, X.; Li, X. Simultaneous enhancement of heavy metal removal and electricity generation in soil microbial fuel cell. *Ecotoxicology and Environmental Safety* **2020**, *192*, 110314.
16. Yaqoob, A.A.; Mohamad Ibrahim, M.N.; Umar, K.; Bhawani, S.A.; Khan, A.; Asiri, A.M.; Khan, M.R.; Azam, M.; AlAmmari, A.M. Cellulose Derived Graphene/Polyaniline Nanocomposite Anode for Energy Generation and Bioremediation of Toxic Metals via Benthic Microbial Fuel Cells. *Polymers* **2021**, *13*, 135.

17. Serrà, A. Self-assembled oil palm biomass-derived modified graphene oxide anode: an efficient medium for energy transportation and bioremediating Cd (II) via microbial fuel cells. *Arabian Journal of Chemistry* **2021**, *14*, 103121.
